# Supplementary material for: Higher Expression of Annexin A2 in Metastatic Bladder Urothelial Carcinoma Promotes Migration and Invasion
Source: MDPI journal article supplement (doi:10.3390/cancers14225664), 2022-11-18
Supplement: s1 [file s1]

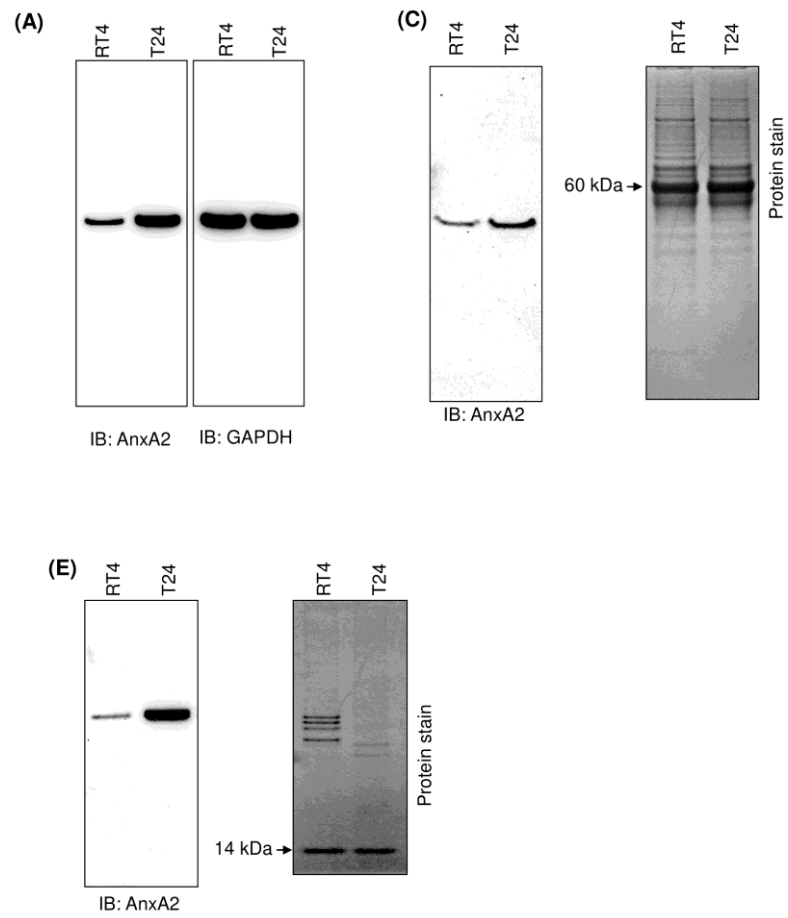

**Figure S1.** Original blots of Figure 3.

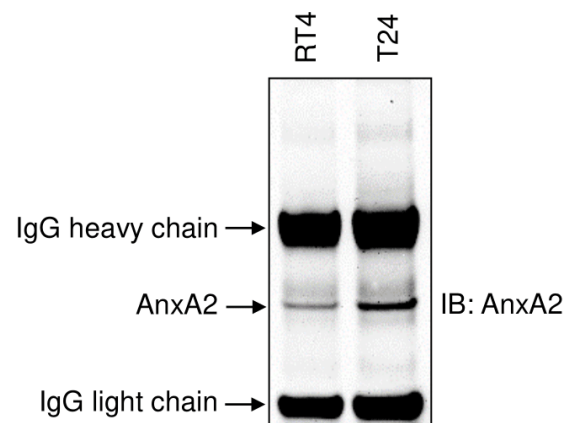

**Figure S2.** Original blots of Figure 5.

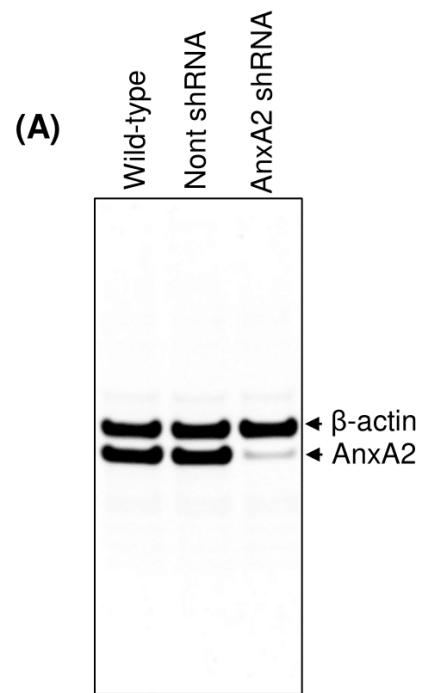

**Figure S3.** Original blots of Figure 6.

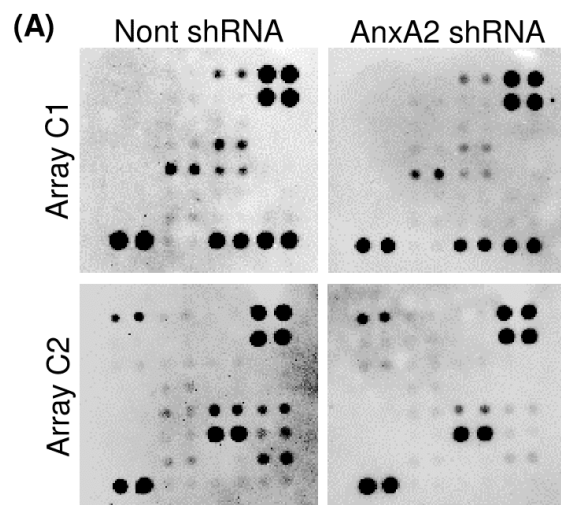

**Figure S4.** Original blots of Figure 7.
